# Supplementary material for: SBA-15 obtained from rice husk ashes wet-impregnated with metals (Al, Co, Ni) as efficient catalysts for 1,4-dihydropyridine three-component reaction
Source: Royal Society of Chemistry journal article supplement (doi:10.1039/d1nj04835j), 2022-01-01
Supplement: d1nj04835j1.pdf [file d1nj04835j1.pdf]

## Supporting Information

### **SBA-15 obtained from rice husk ashes wet-impregnated with metals (Al, Co, Ni) as efficient catalysts for 1,4-dihydropyridine three-component reaction**

M. Sc. Heitor A. G. Bazani, Allison Thomé, Prof. Dr. Ricardo F. Affeldt\*

and Prof. Dr. Luiz F. D. Probst\*

*Department of Chemistry, Federal University of Santa Catarina*

*Florianópolis, Santa Catarina, Brazil, 88040-900.*

*\*Corresponding authors: [luiz.probst@ufsc.br](mailto:luiz.probst@ufsc.br), [ricardo.affeldt@ufsc.br](mailto:ricardo.affeldt@ufsc.br)*

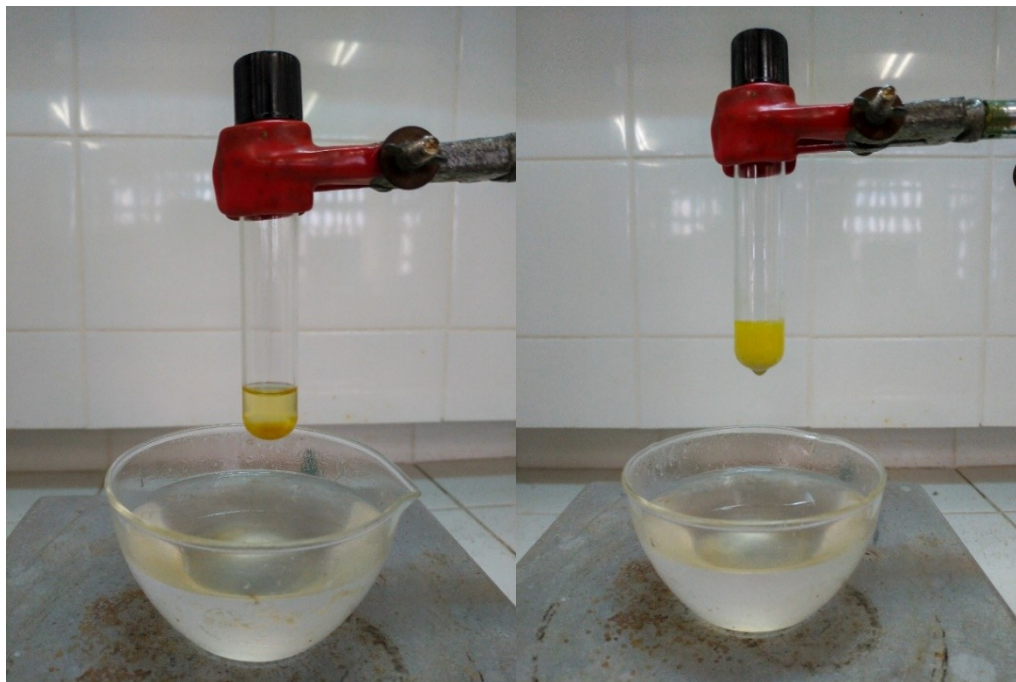

Figure S1. Batch reaction system utilized in this study. Batch reactors: before reaction (left) and after reaction (right).

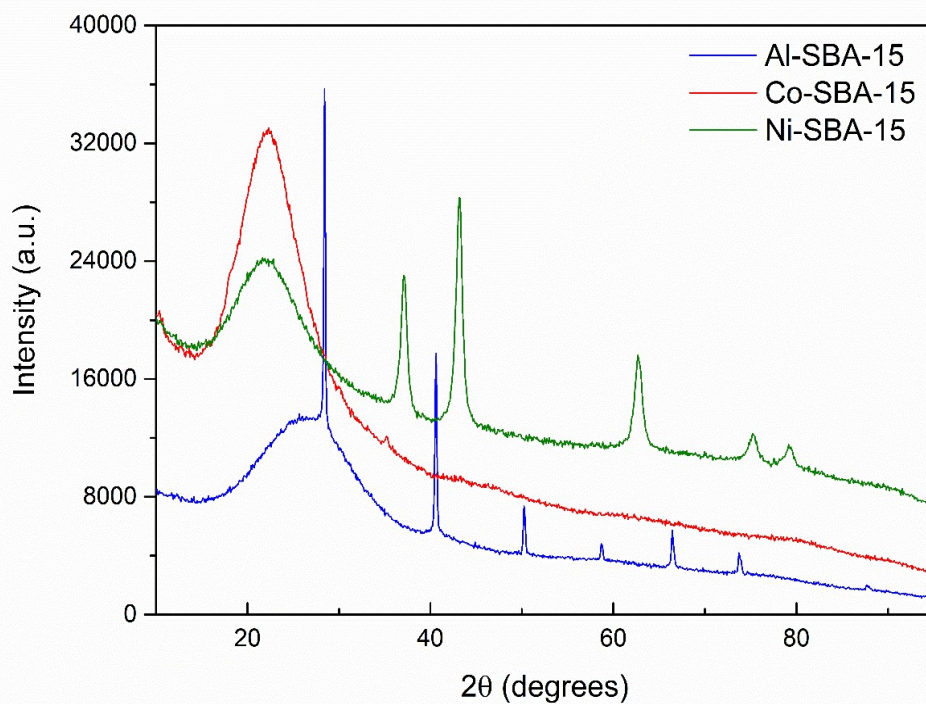

Figure S2. Wide-Angle XRD diffractogram of the catalysts prepared.

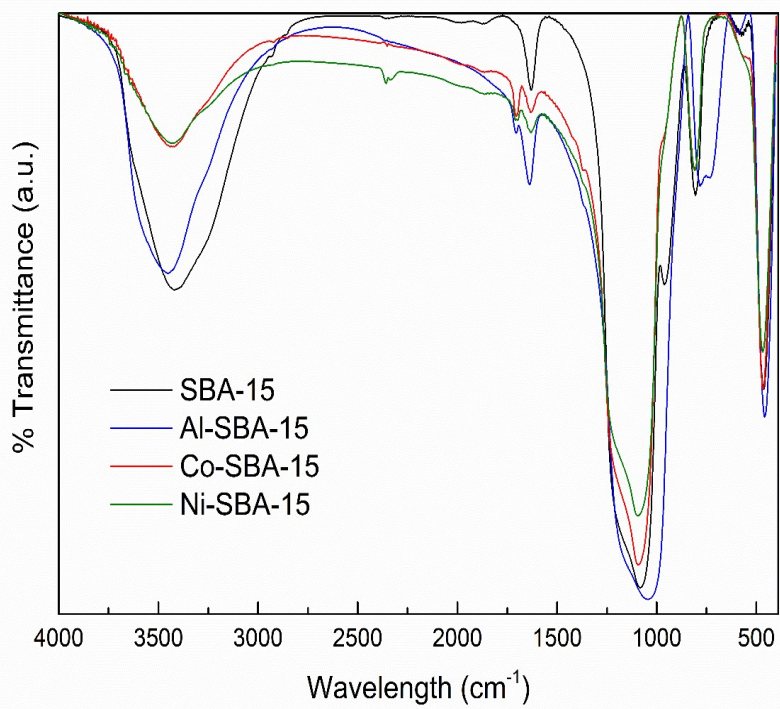

Figure S3. FT-IR spectra of the catalysts prepared.

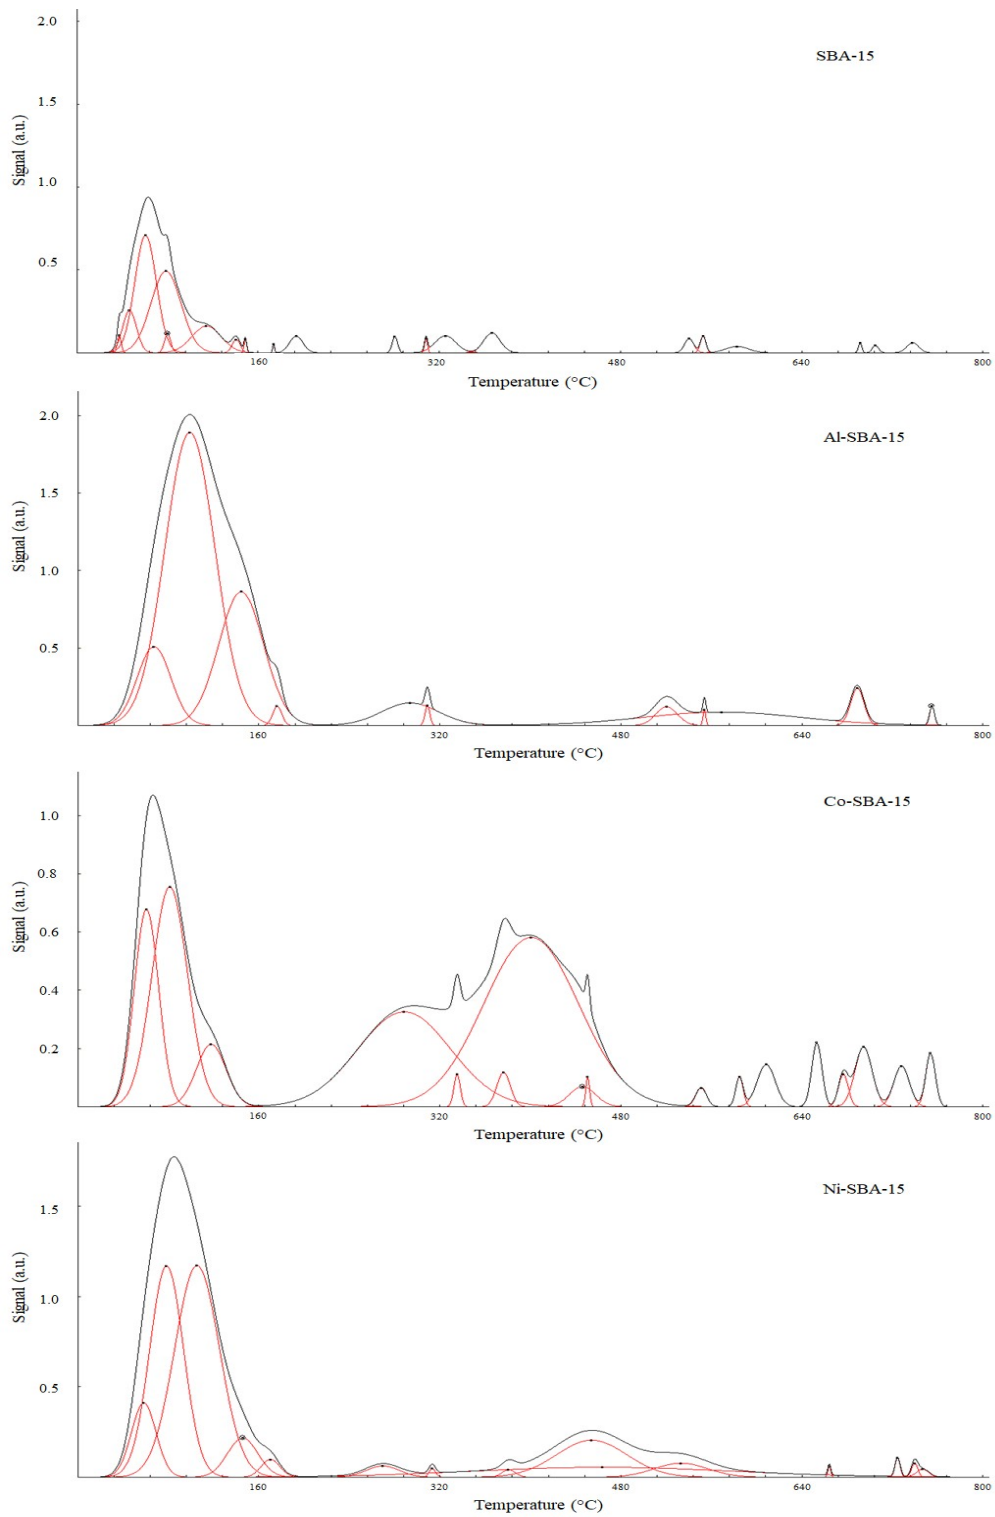

Figure S4.  $\text{NH}_3$ -TPD analysis of the catalysts prepared.

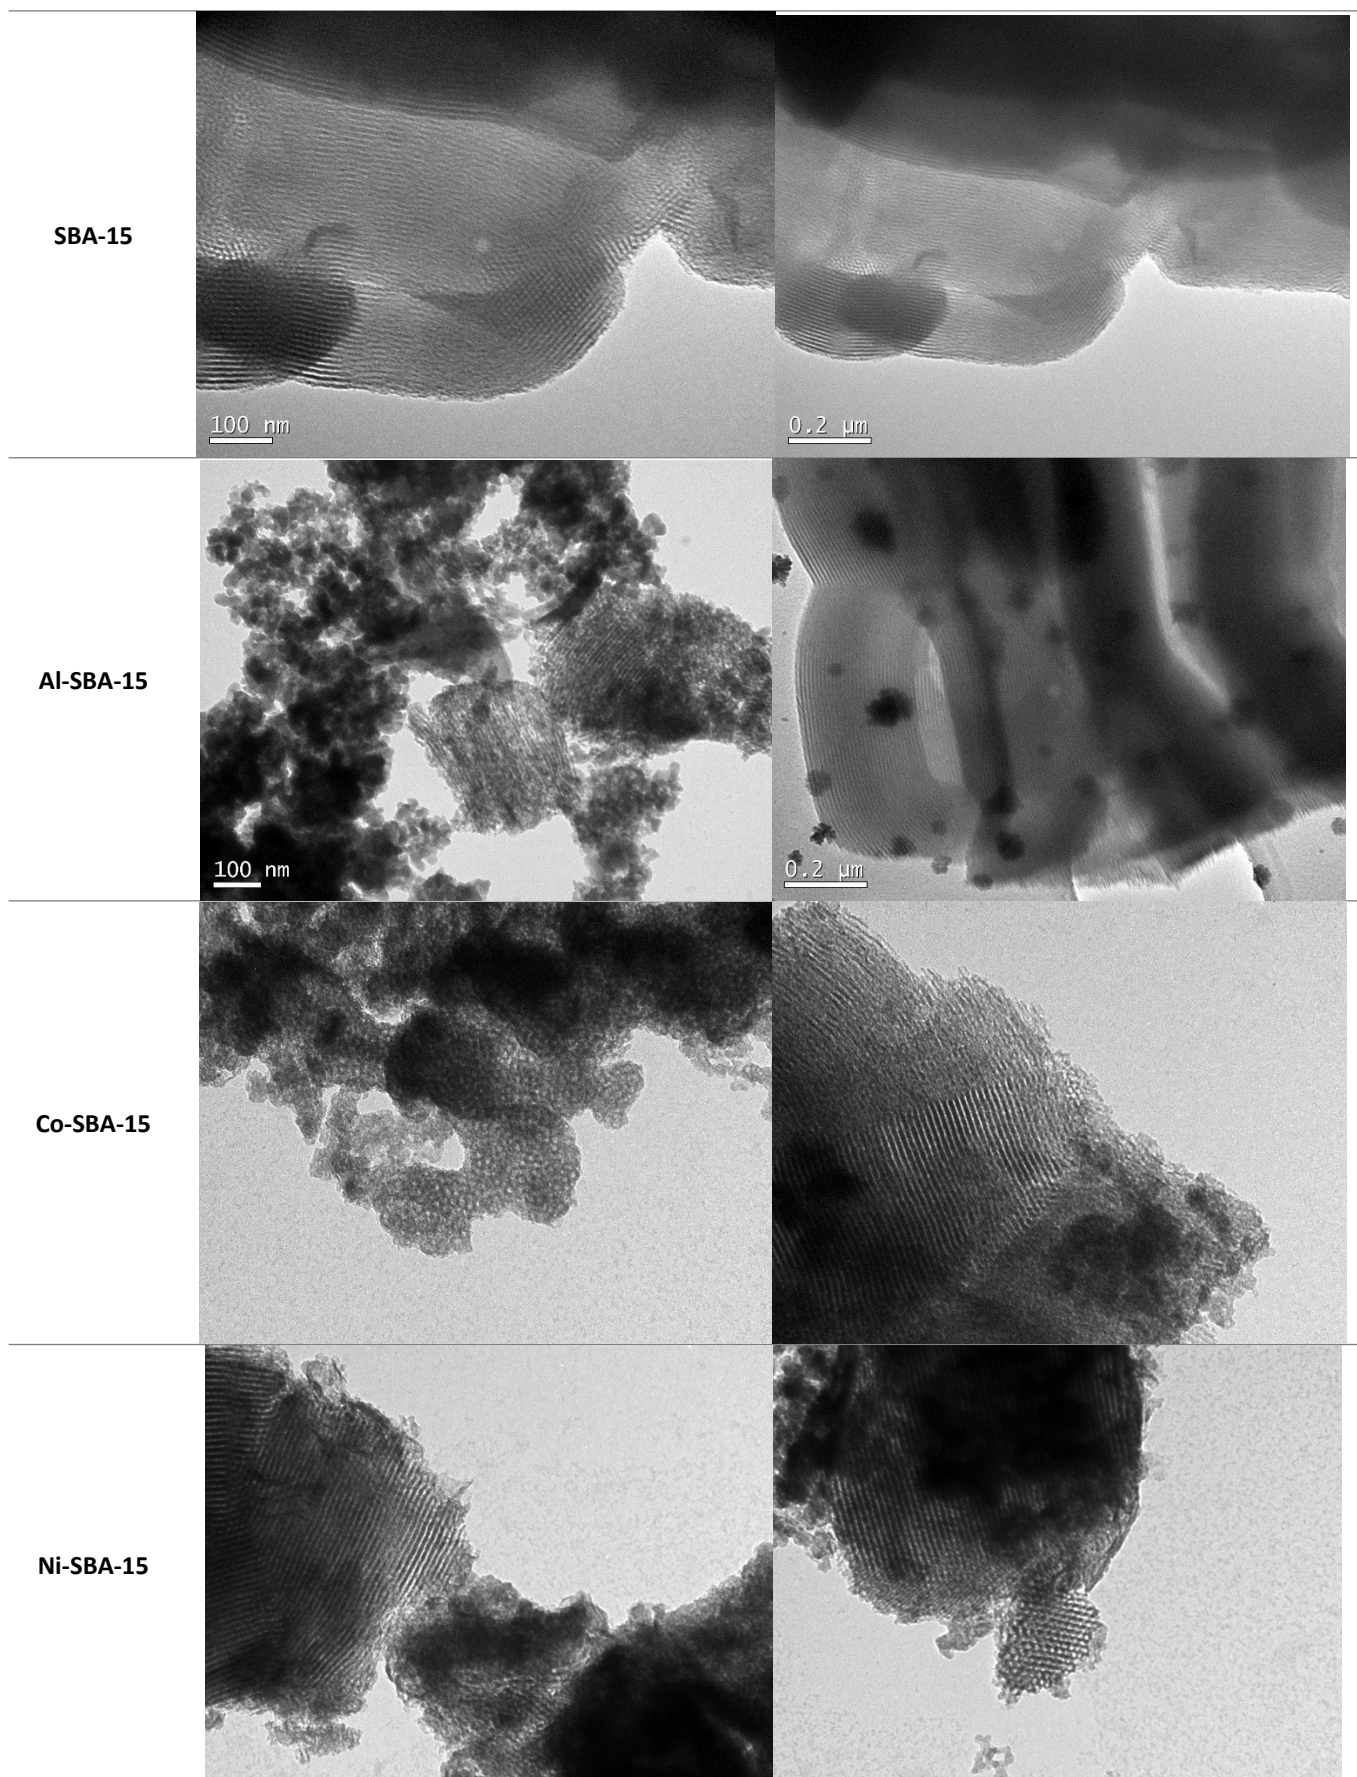

Figure S5. TEM micrographs of the catalysts prepared.

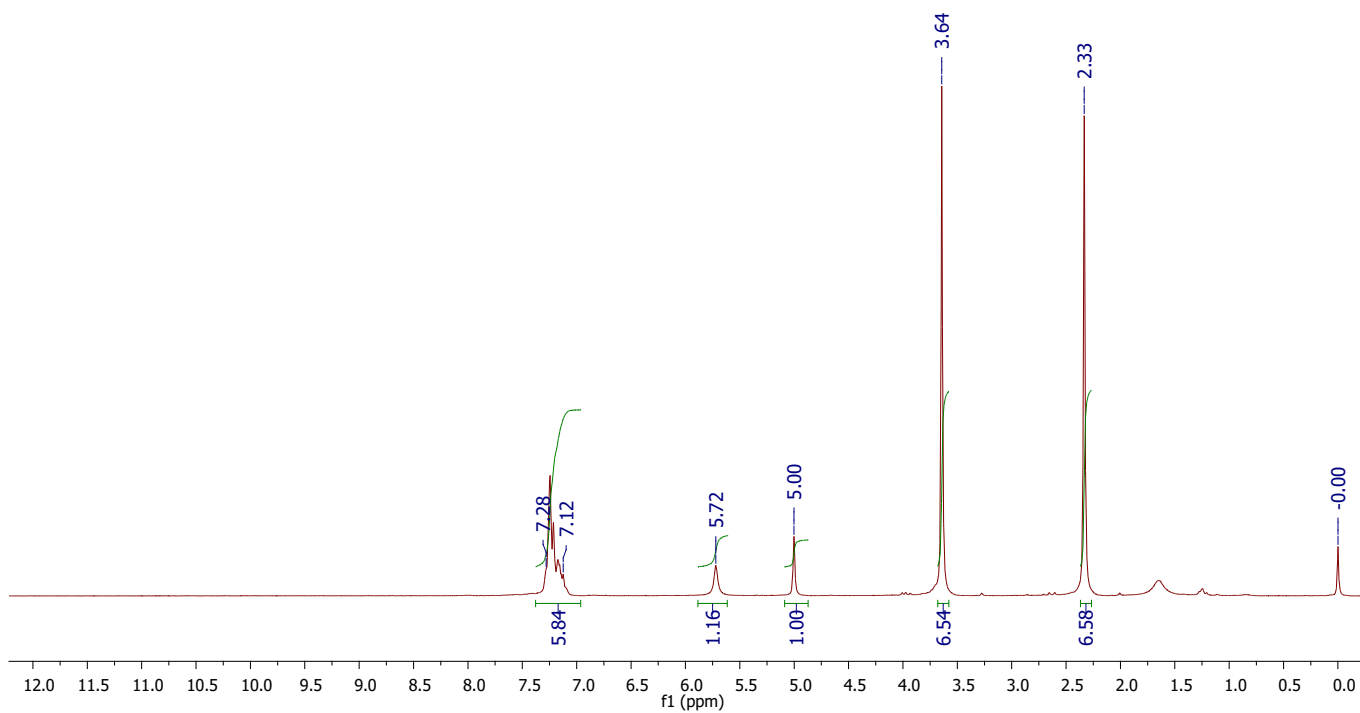

Figure S6.  $^1\text{H}$  NMR ( $\text{CDCl}_3$ , 200 MHz) of dimethyl 1,4-dihydro-2,6-dimethyl-4-phenylpyridine-3,5-dicarboxylate.

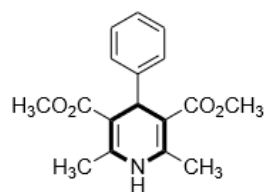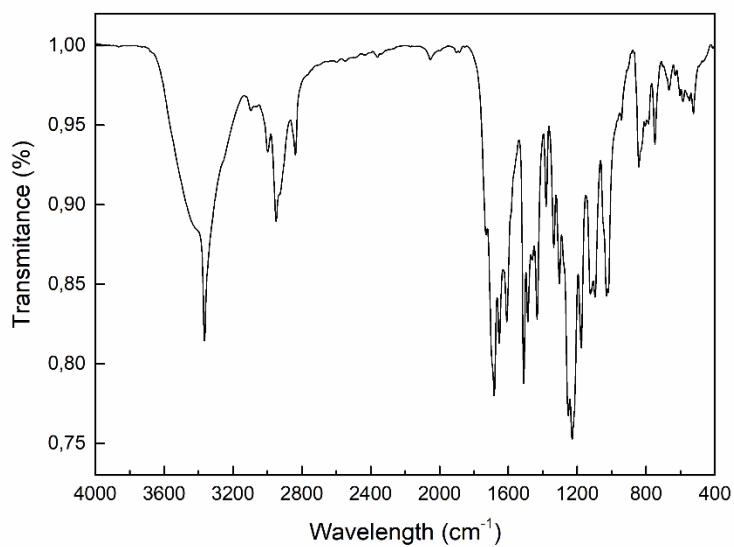

Figure S7. FT-IR spectrum of dimethyl 1,4-dihydro-2,6-dimethyl-4-phenylpyridine-3,5-dicarboxylate.

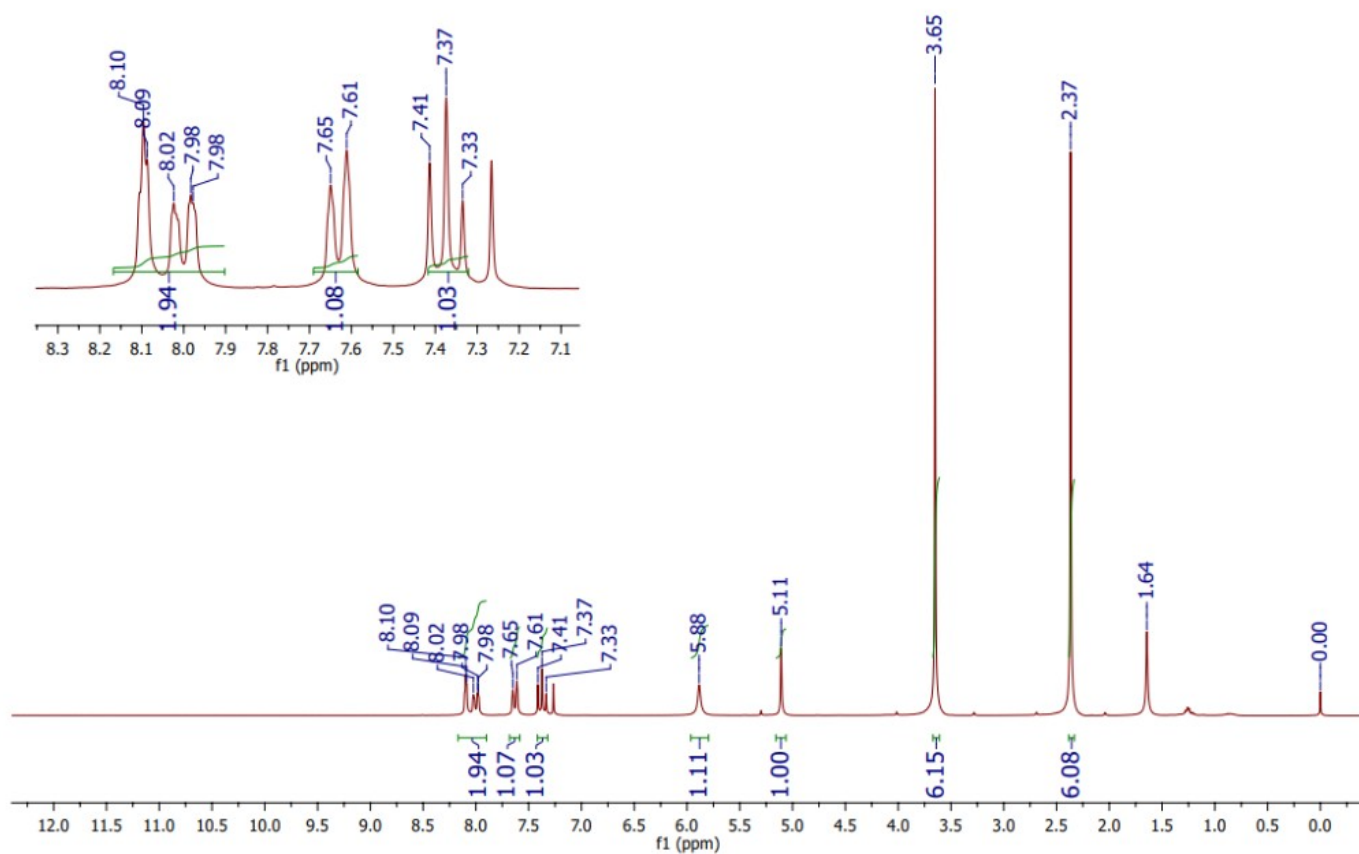

Figure S8. <sup>1</sup>H NMR (CDCl<sub>3</sub>, 200 MHz) of dimethyl 1,4-dihydro-2,6-dimethyl-4-(3-nitrophenyl)-pyridine-3,5-dicarboxylate.

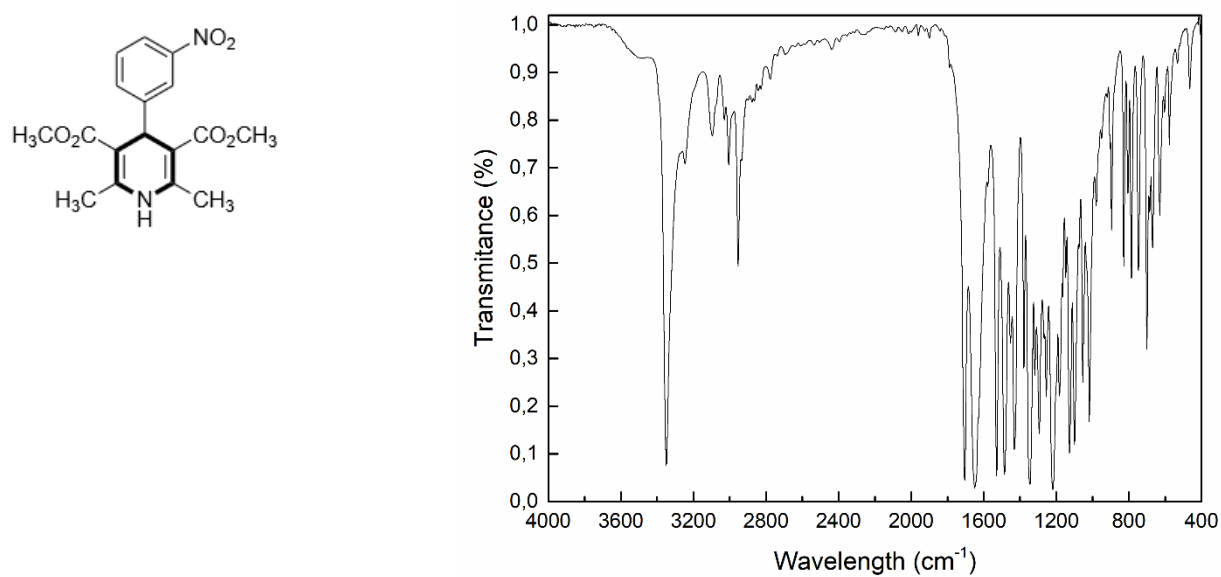

Figure S9. FT-IR spectrum of dimethyl 1,4-dihydro-2,6-dimethyl-4-(3-nitrophenyl)-pyridine-3,5-dicarboxylate.

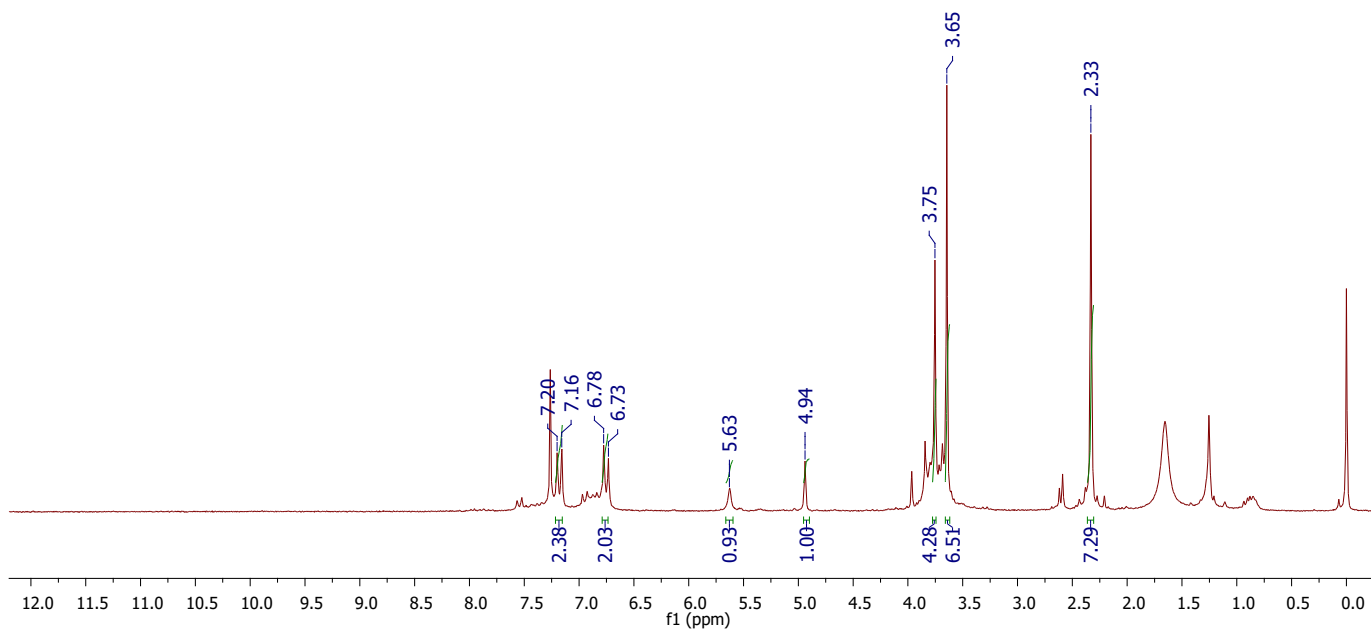

Figure S10.  $^1\text{H}$  NMR ( $\text{CDCl}_3$ , 200 MHz) of dimethyl 1,4-dihydro-2,6-dimethyl-4-(4-methoxyphenyl)-pyridine-3,5-dicarboxylate.

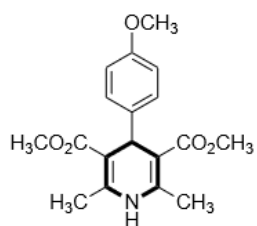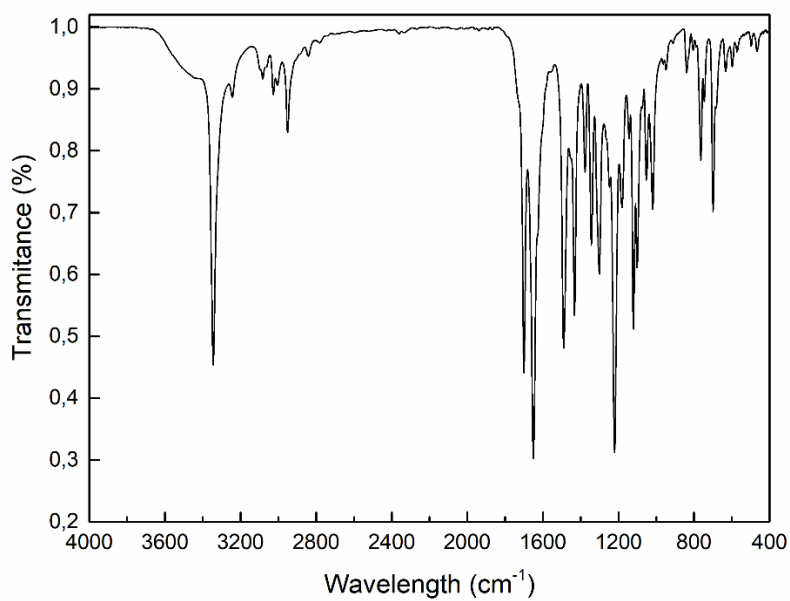

Figure S11. FT-IR spectrum of dimethyl 1,4-dihydro-2,6-dimethyl-4-(4-methoxyphenyl)-pyridine-3,5-dicarboxylate.



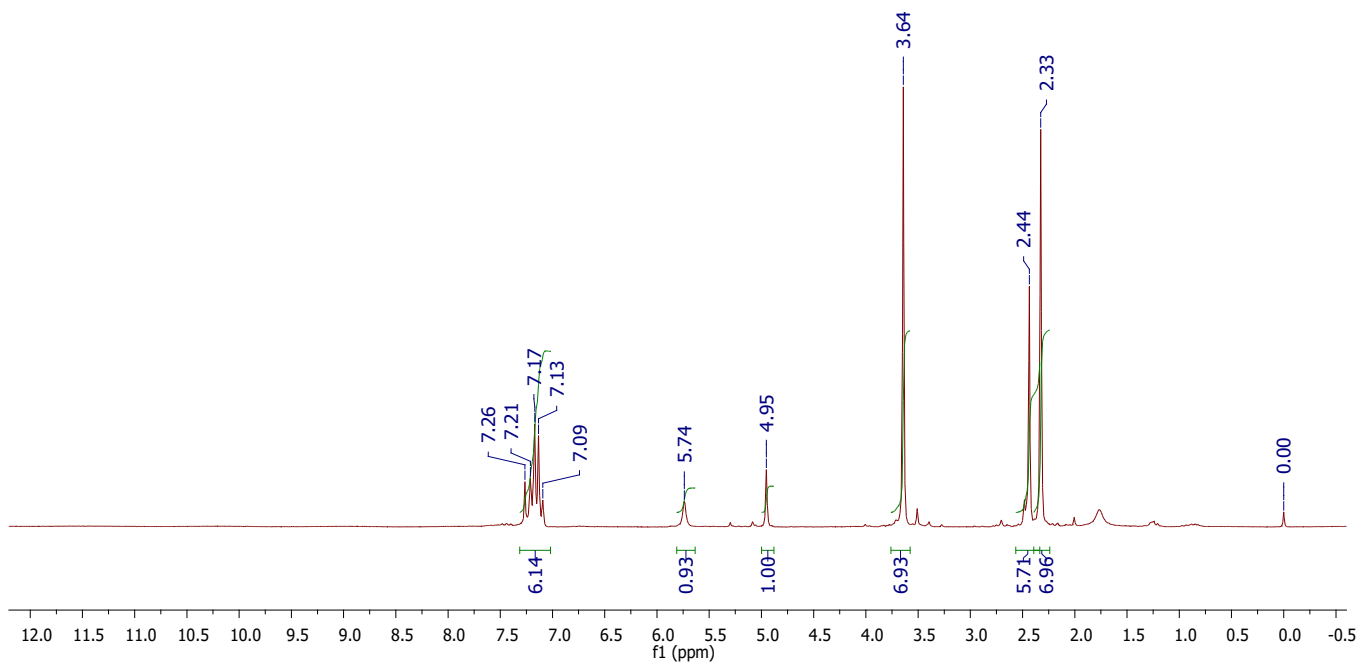

Figure S12.  $^1\text{H}$  NMR ( $\text{CDCl}_3$ , 200 MHz) of dimethyl 2,6-dimethyl-4-(4-(methylthio)phenyl)-1,4-dihydropyridine-3,5-dicarboxylate.

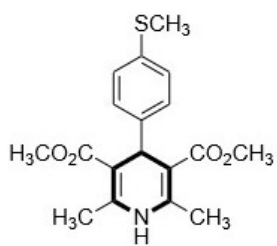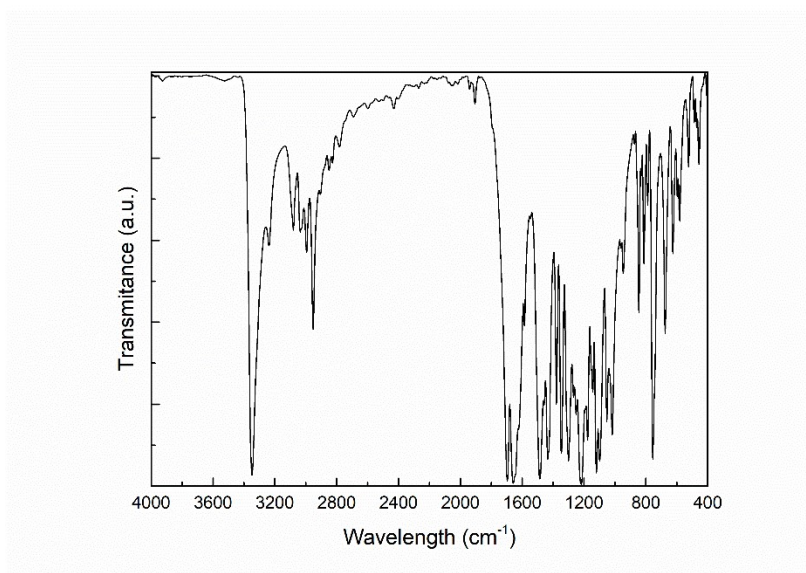

Figure S13. FT-IR spectrum of dimethyl 2,6-dimethyl-4-(4-(methylthio)phenyl)-1,4-dihydropyridine-3,5-dicarboxylate.

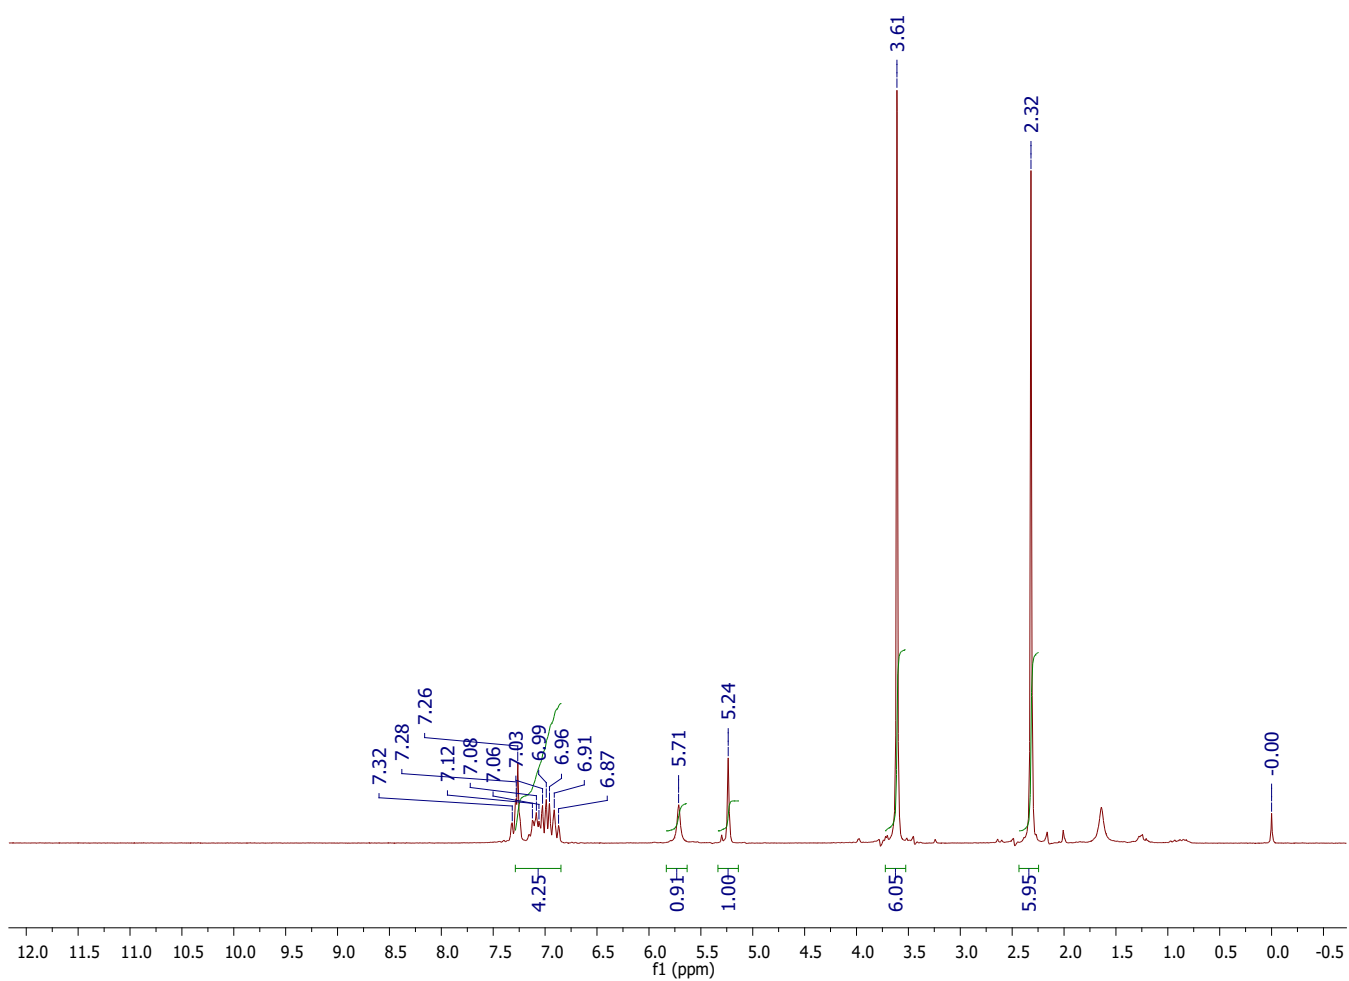

Figure S14.  $^1\text{H}$  NMR ( $\text{CDCl}_3$ , 200 MHz) of dimethyl 4-(2-fluorophenyl)-2,6-dimethyl-1,4-dihydropyridine-3,5-dicarboxylate.

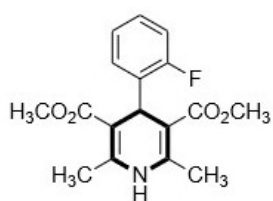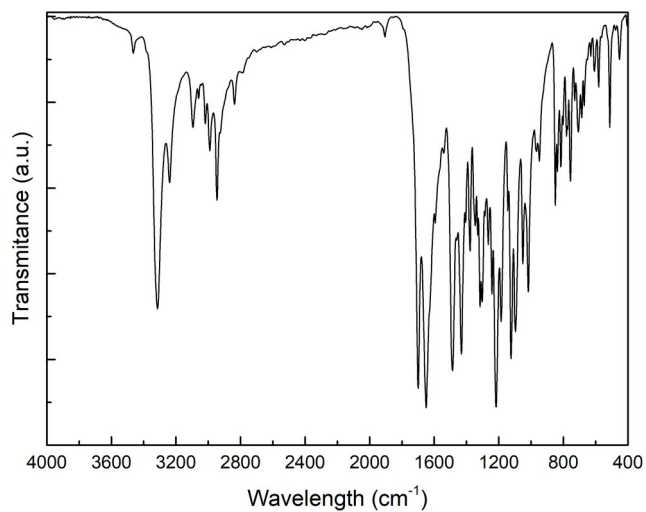

Figure S15. FT-IR spectrum of dimethyl 4-(2-fluorophenyl)-2,6-dimethyl-1,4-dihydropyridine-3,5-dicarboxylate.

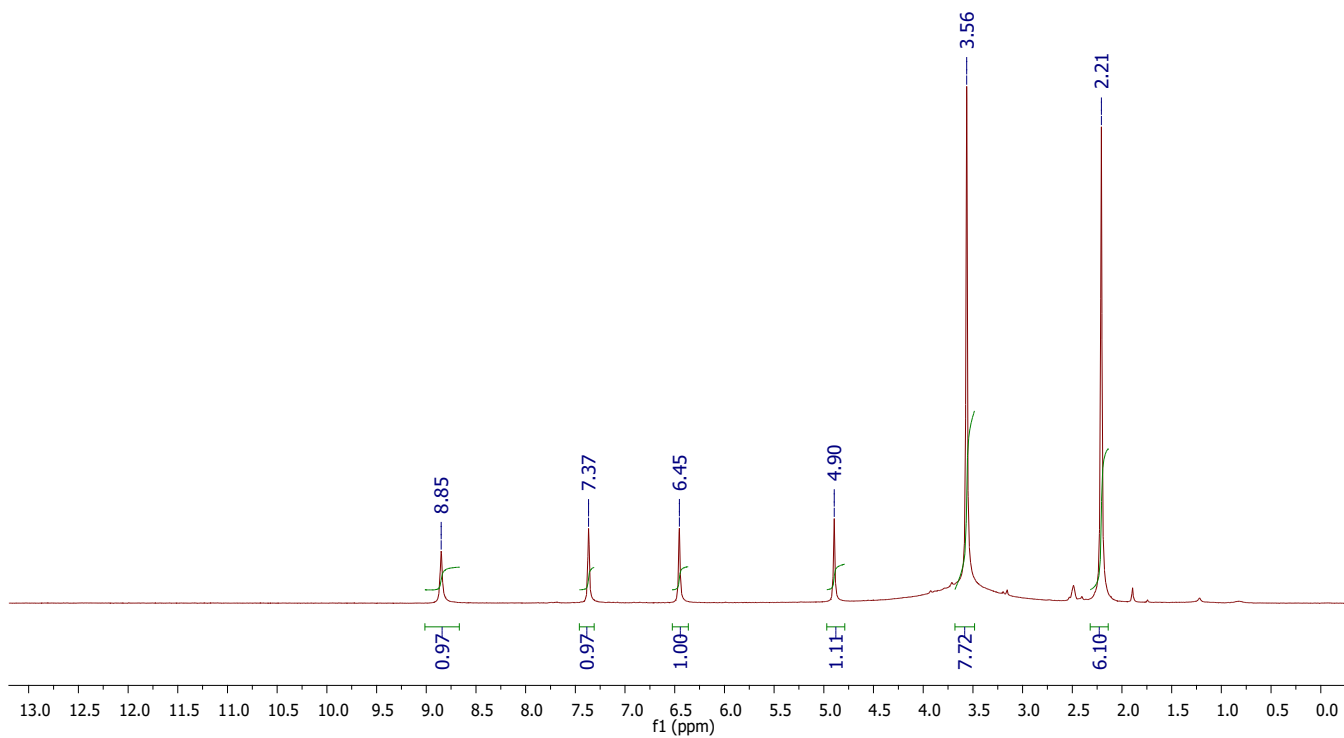

Figure S16.  $^1\text{H}$  NMR (dms $o$ - $d_6$ , 200 MHz) of dimethyl 4-(1*H*-imidazol-2-yl)-2,6-dimethyl-1,4-dihydropyridine-3,5-dicarboxylate.

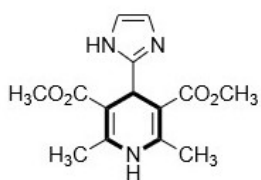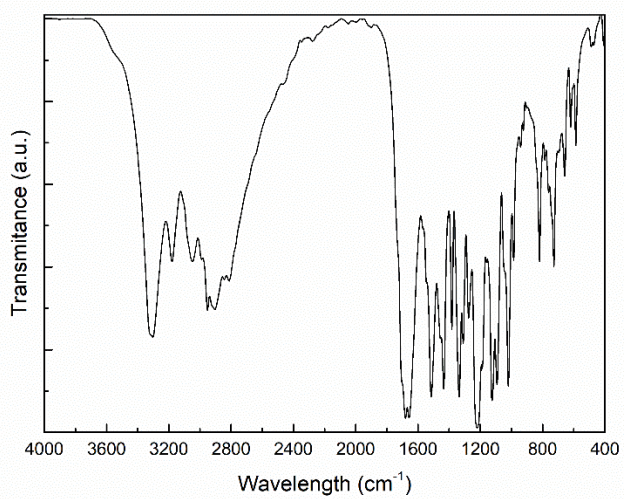

Figure S17. FT-IR spectrum of dimethyl 4-(1*H*-imidazol-2-yl)-2,6-dimethyl-1,4-dihydropyridine-3,5-dicarboxylate.
